# Supplementary material for: Potential of silk fibroin/chondrocyte constructs of muga silkworm Antheraea assamensis for cartilage tissue engineering
Source: Royal Society of Chemistry journal article supplement (doi:10.1039/c6tb00717a), 2016-01-01
Supplement: c6tb00717a1.pdf [file c6tb00717a1.pdf]

**Title: Potential of muga silkworm *Antheraea assamensis* silk fibroin/chondrocyte constructs for cartilage tissue engineering.**

**Authors: Nandana Bhardwaj<sup>1\*</sup>, Yogendra Pratap Singh<sup>2</sup>, Dipali Devi<sup>1</sup>, Raghuram Kandimalla<sup>3</sup>, Jibon Kotoky<sup>3</sup>, Biman B. Mandal<sup>2</sup>**

### 1. Histological and immunohistochemical staining of non-seeded scaffolds

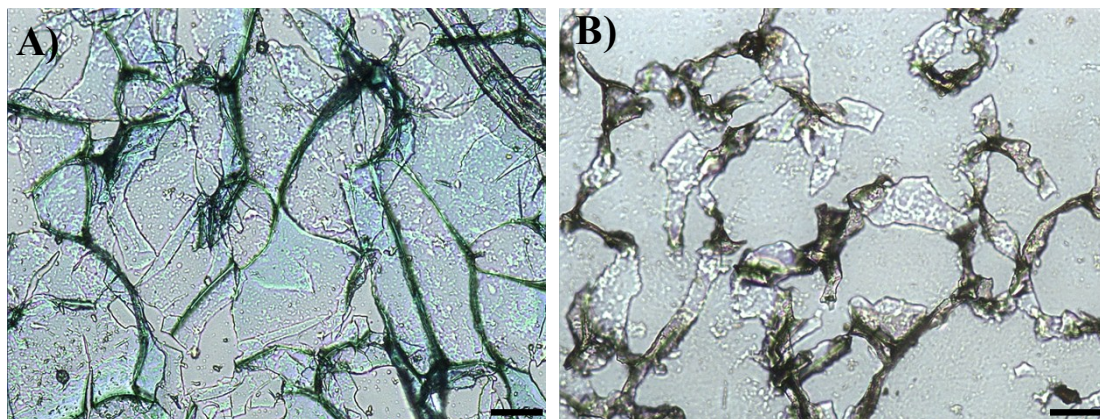

Fig. S1. Alcian blue histological staining (A) and immunohistochemical staining (B) of non-seeded scaffolds after 2 weeks. Scale bar represents 50  $\mu\text{m}$ .
